# Supplementary material for: Aircraft In-situ Measurements from SOCRATES Constrain the Anthropogenic Perturbations of Cloud Droplet Number
Source: Copernicus journal article supplement (doi:10.5194/egusphere-2025-2009), 2025-05-14
Supplement: Supplementary file 1 [file egusphere-2025-2009-supplement.pdf]

*Supplement of*

**Aircraft In-situ Measurements from SOCRATES  
Constrain the Anthropogenic Perturbations of Cloud  
Droplet Number**

Ci Song et al.

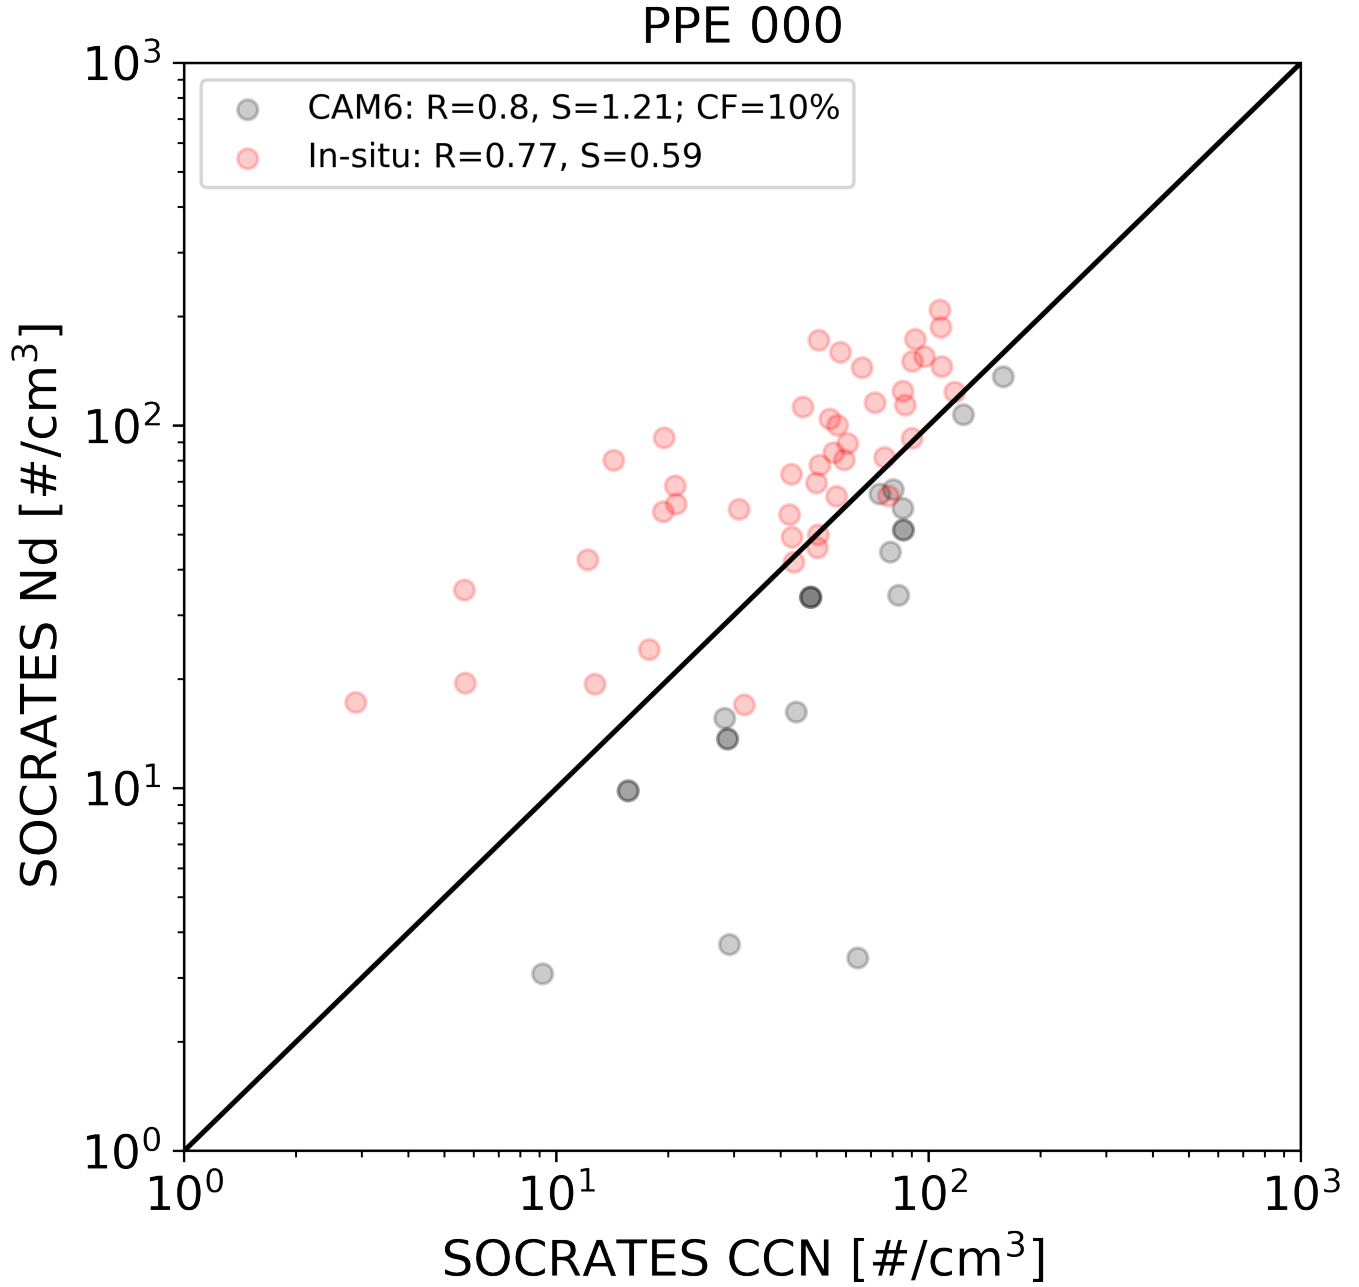

Figure S1: Relationship between SOCRATES CCN and cloud droplet number concentration ( $N_d$ ) from flight composites from CAM6 default configuration (black dots) and in-situ measurements (red dots). Model outputs are collocated with in-situ measurements from flight tracks by 50 m x 2 min bin means. Same with Figure 2 in the main text but using a threshold of liquid cloud fraction  $\geq 10\%$  for in-cloud  $N_d$ .

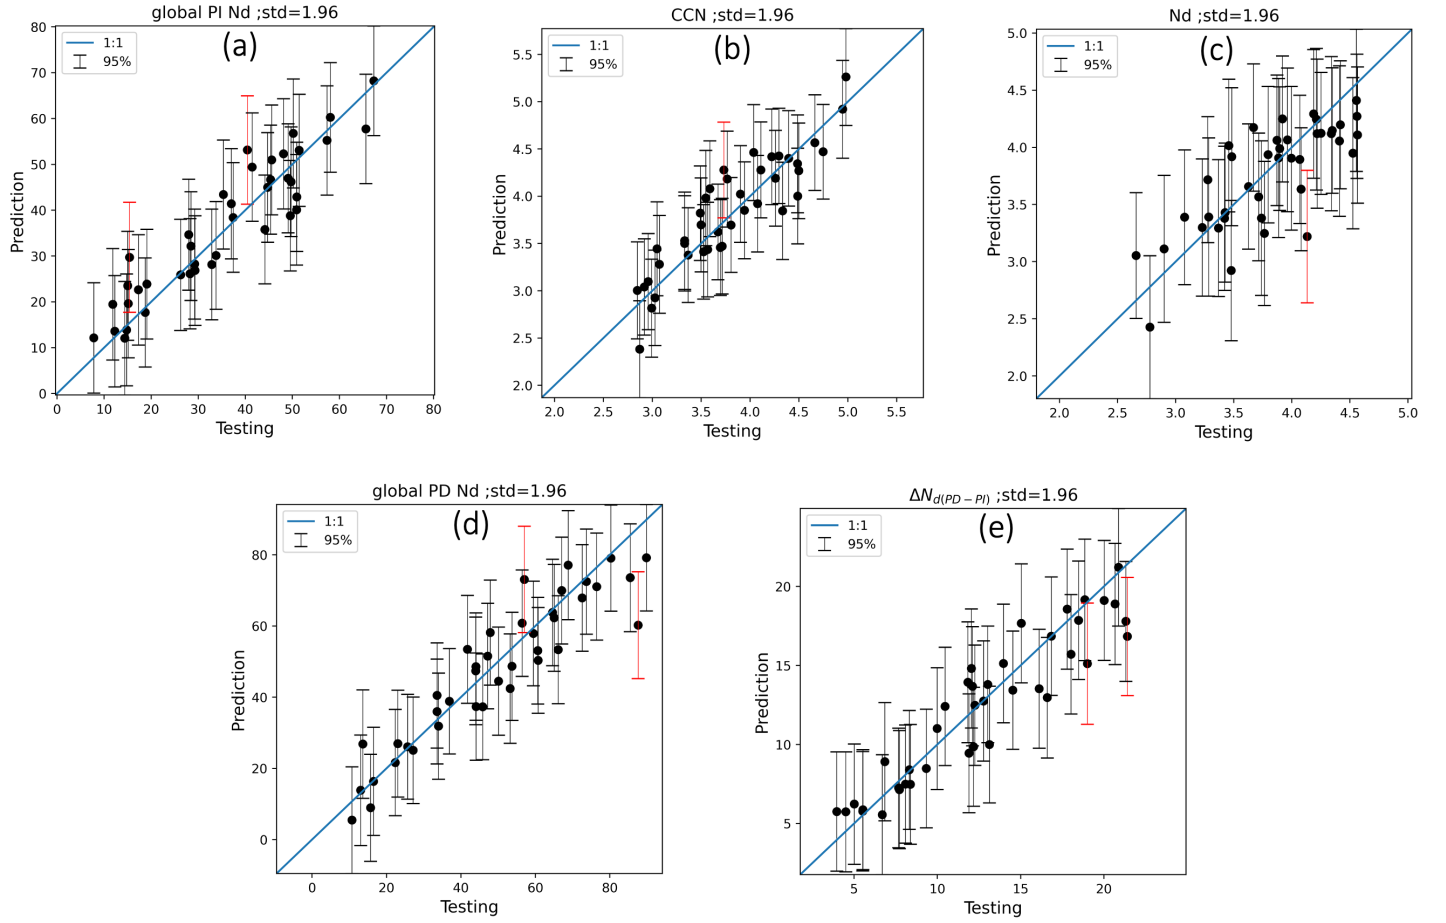

Figure S2: Emulator predictions for each emulator used in this study. For each model output (a-e), the value for the model output for the 40 validation runs is plotted against the mean predictions by the emulator (black dots). The vertical lines are 95% bounds of emulator uncertainty on the emulator mean predictions. Emulator uncertainties overlapped with validation runs are shown in black vertical lines. Otherwise in red.

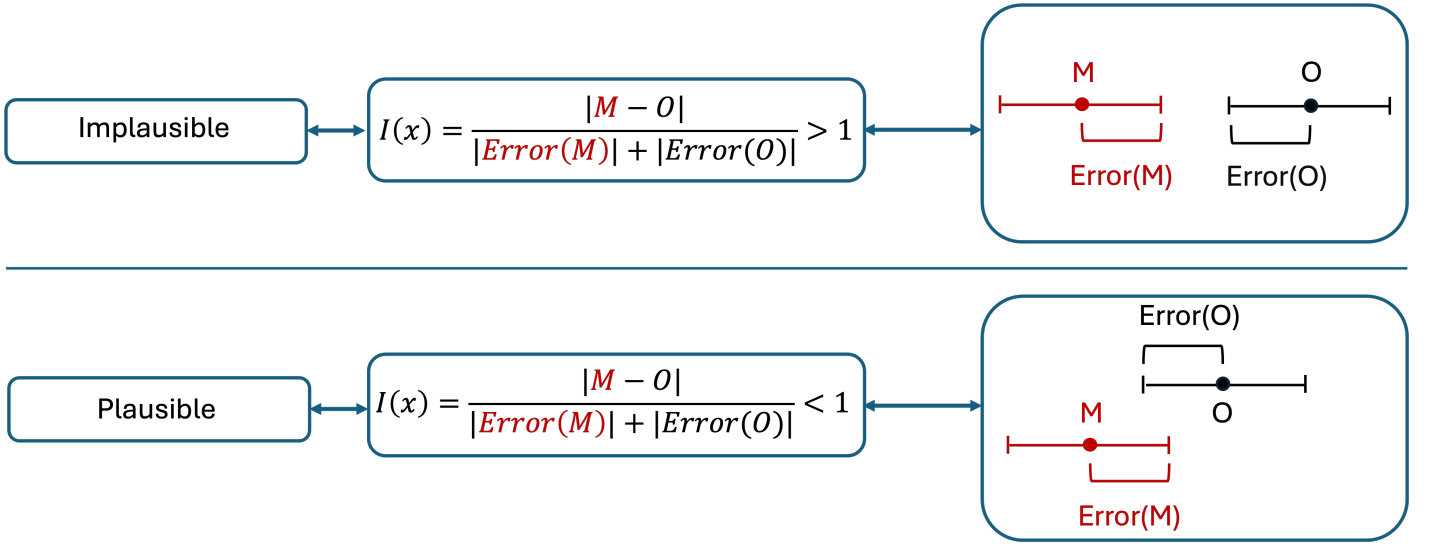

Figure S3: An illustration of our constraint process in Eq 1.  $M$  is the emulator campaign mean and  $O$  is the observationally-campaign mean.  $Error(M)$  and  $Error(O)$  denotes the deviation from the emulator campaign mean and observation campaign mean, respectively.  $Error(M)$  comes from emulator uncertainty and can be directly calculated from GP regression. Observation uncertainty is from instrument errors, sampling strategies and environmental noises. Briefly, models variants are excluded as implausible when the distance between emulator mean and observation mean is greater than the sum of their uncertainties ( $(|M| + |O|) \geq (|Error(M)| + |Error(O)|)$ ).

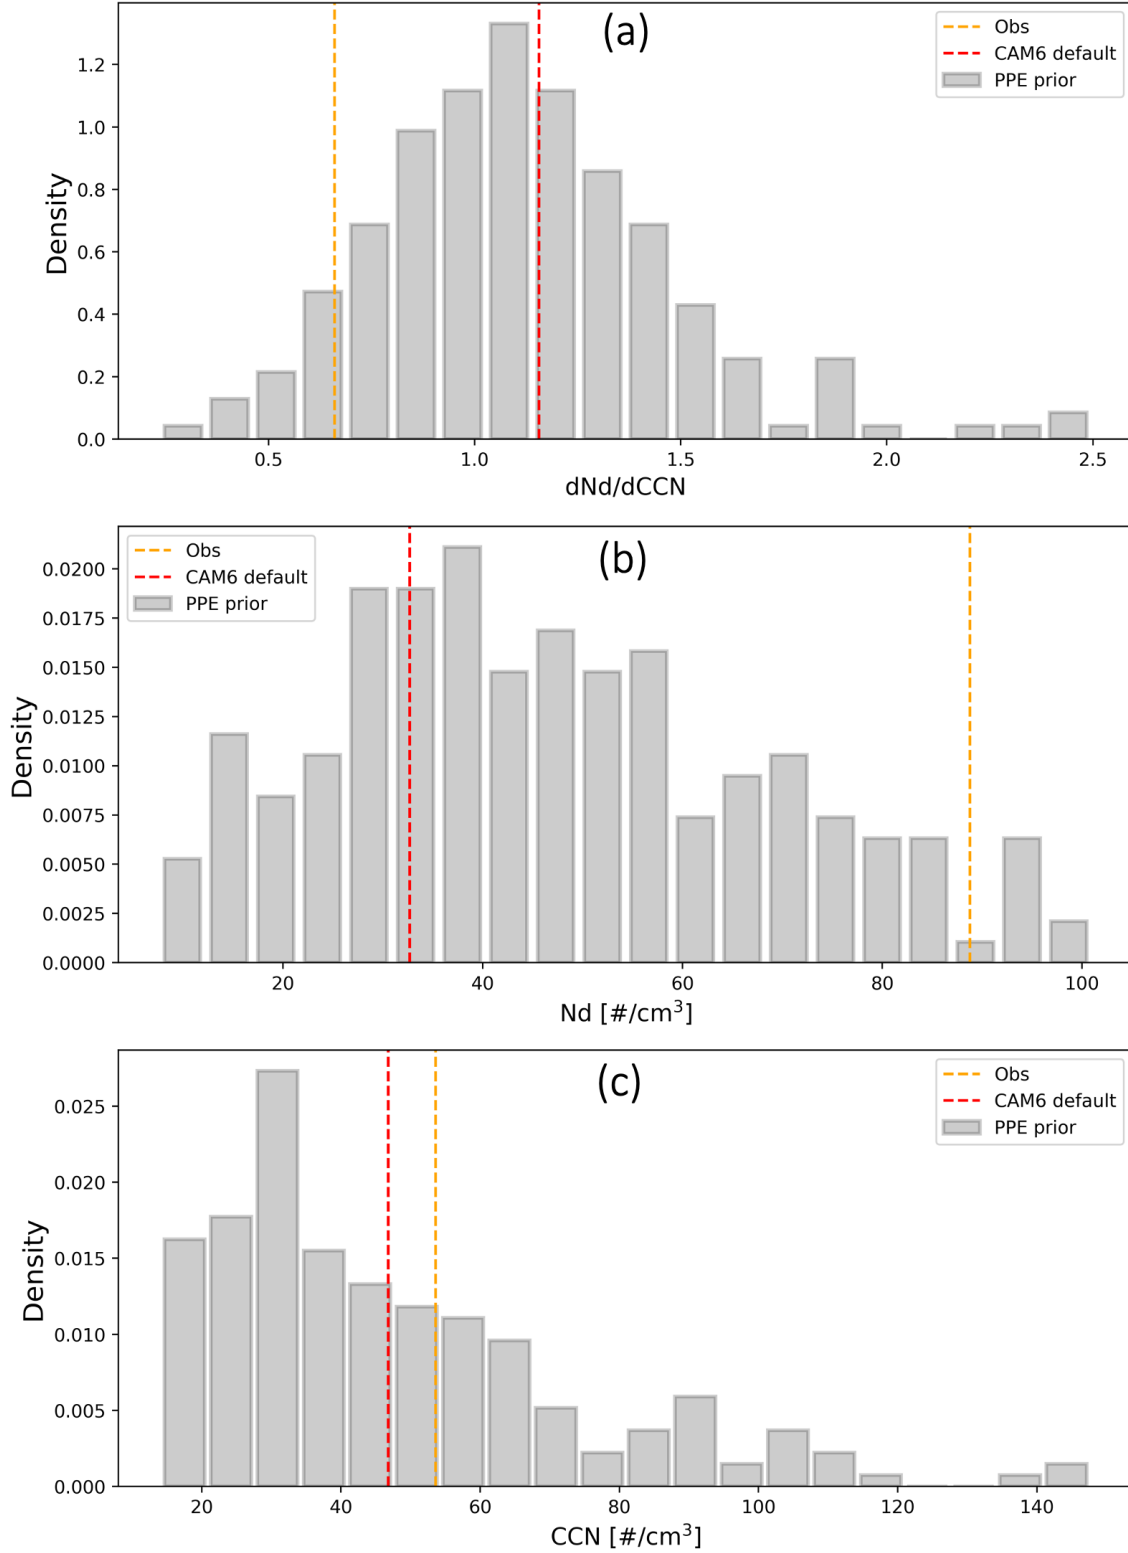

Figure S4: Probability distributions of the (a) linear regression slope of  $N_d$  on CCN, (b)  $N_d$  and (c) CCN from the CAM6 PPE flight composites (50 m x 2 min bin means, matched by space and time) collocated to in-situ flight track measurements (orange). CAM6 default is shown in red dashed lines.

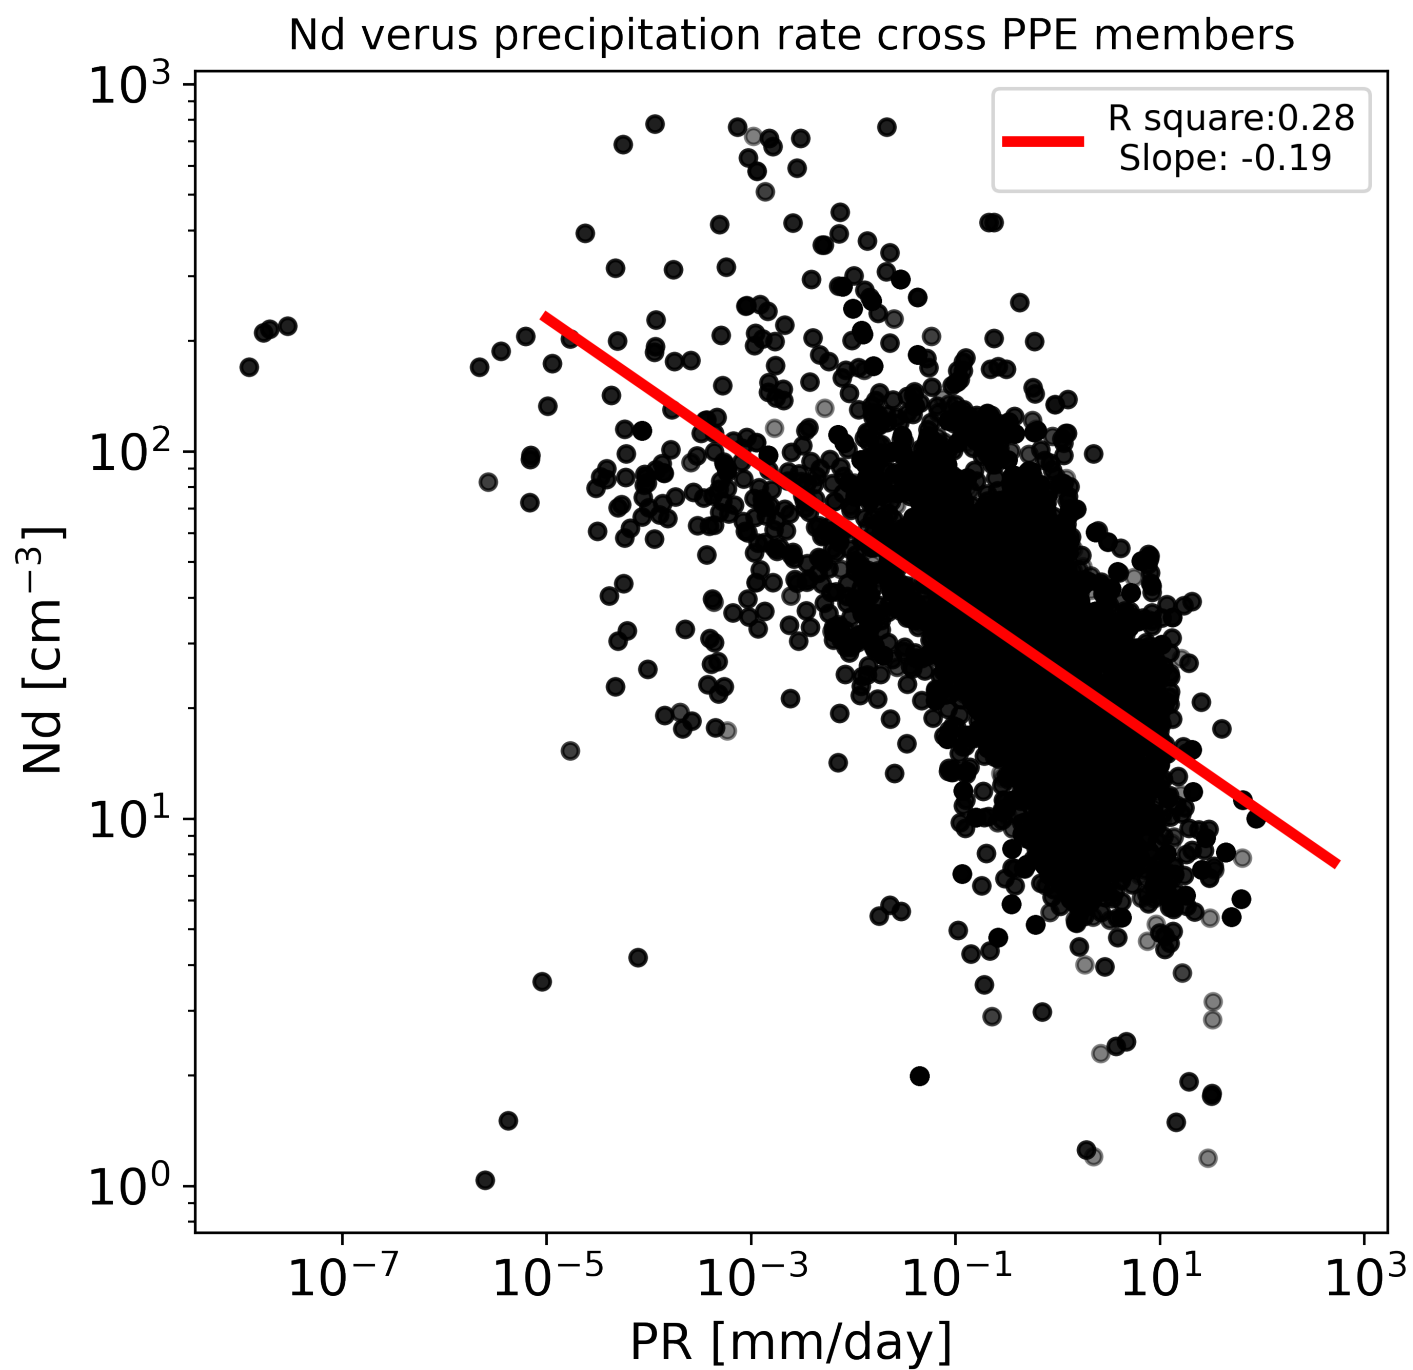

Figure S5: Nd versus precipitation rate. Each dot represents one simulation time step averaged across ensemble members.

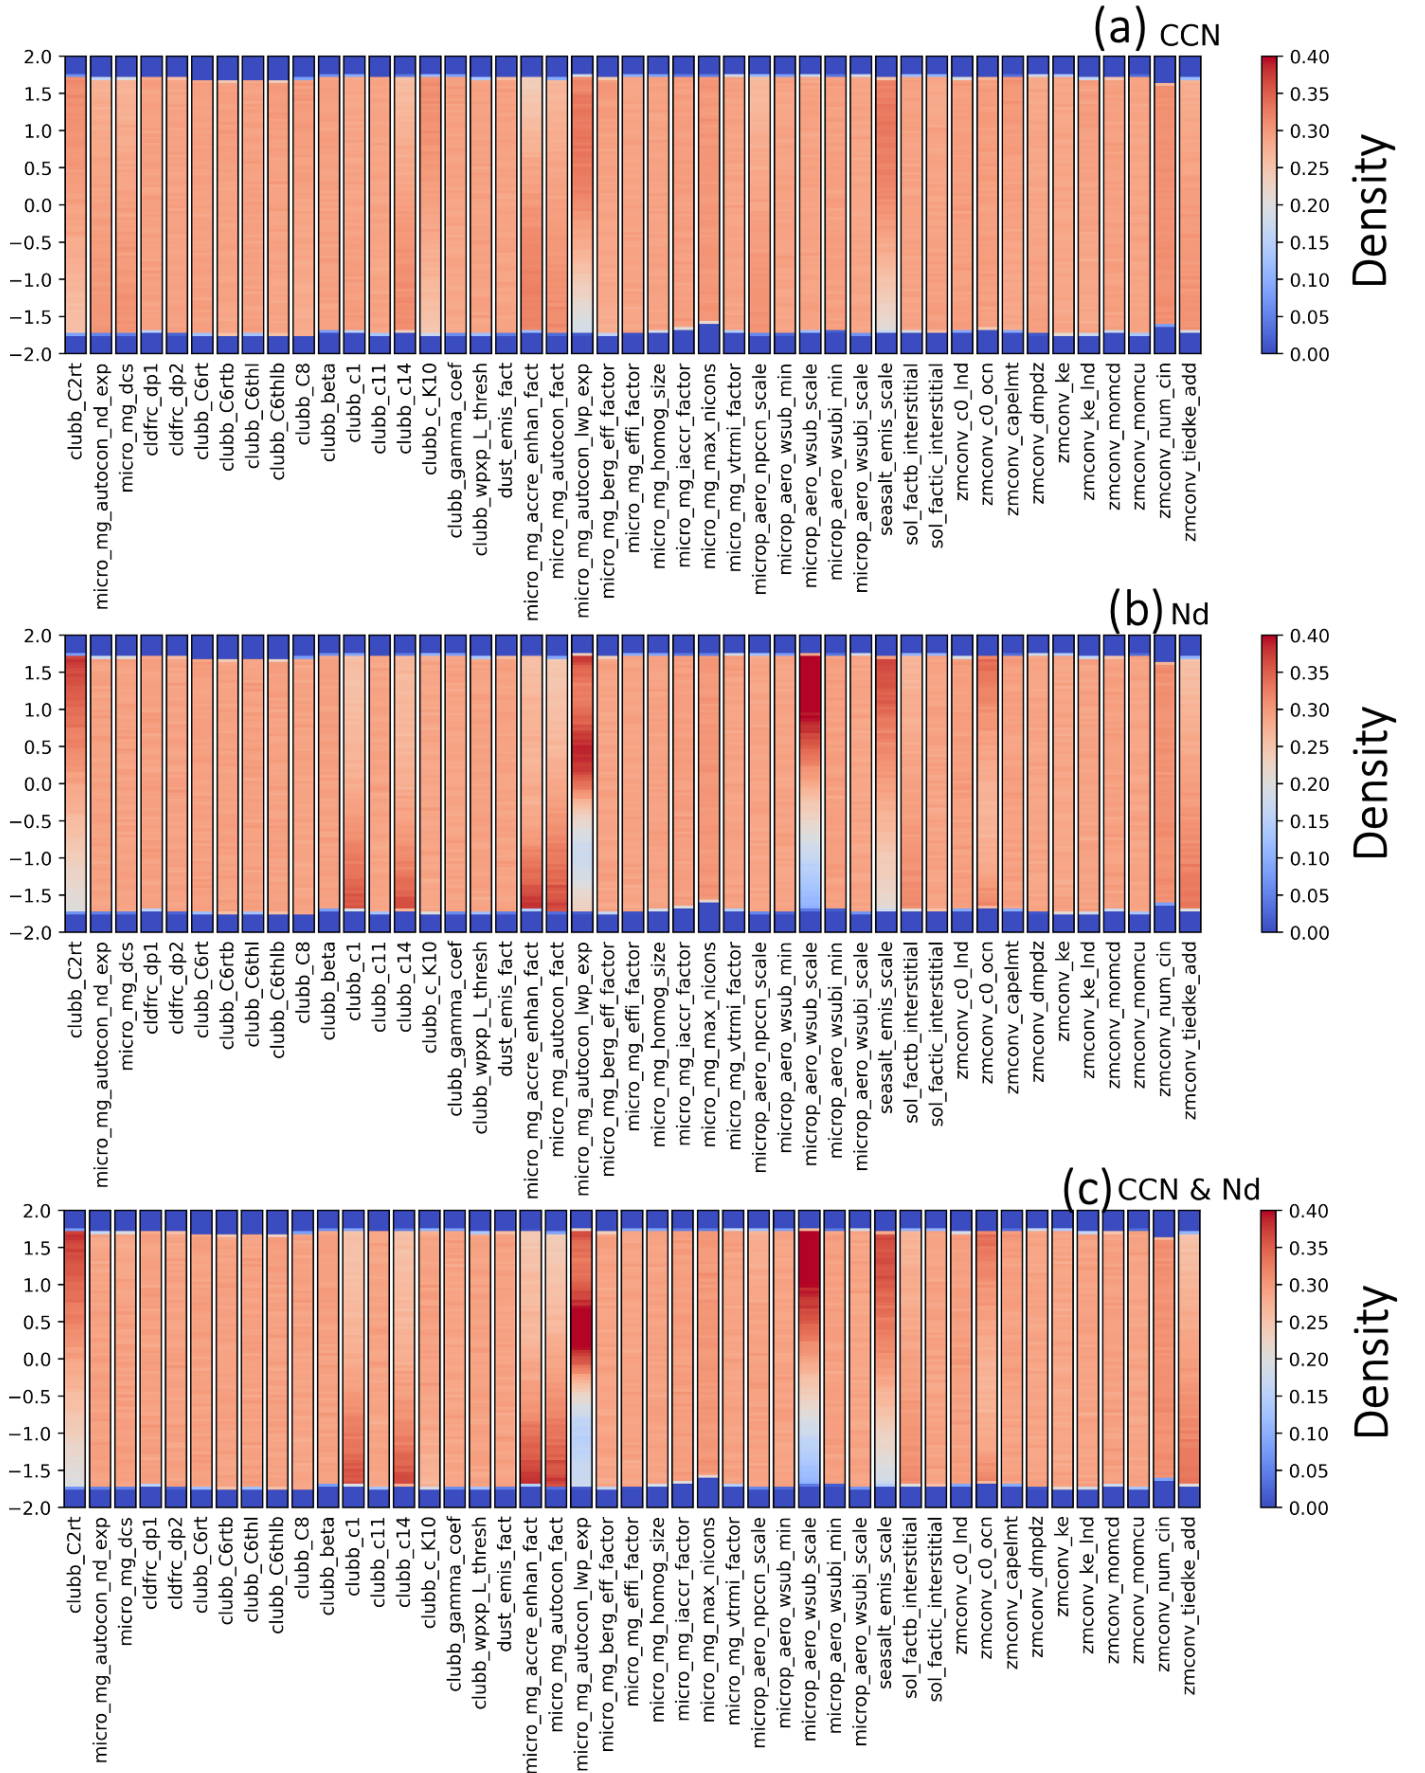

Figure S6: 45 parameters with constrained parameter spaces with observations of (a) CCN, (b)  $N_d$  and (c) CCN &  $N_d$ . Parameter spaces are standardized with mean 0 and variance 1. Warmer colors mean a higher intensity and more data points in that range.

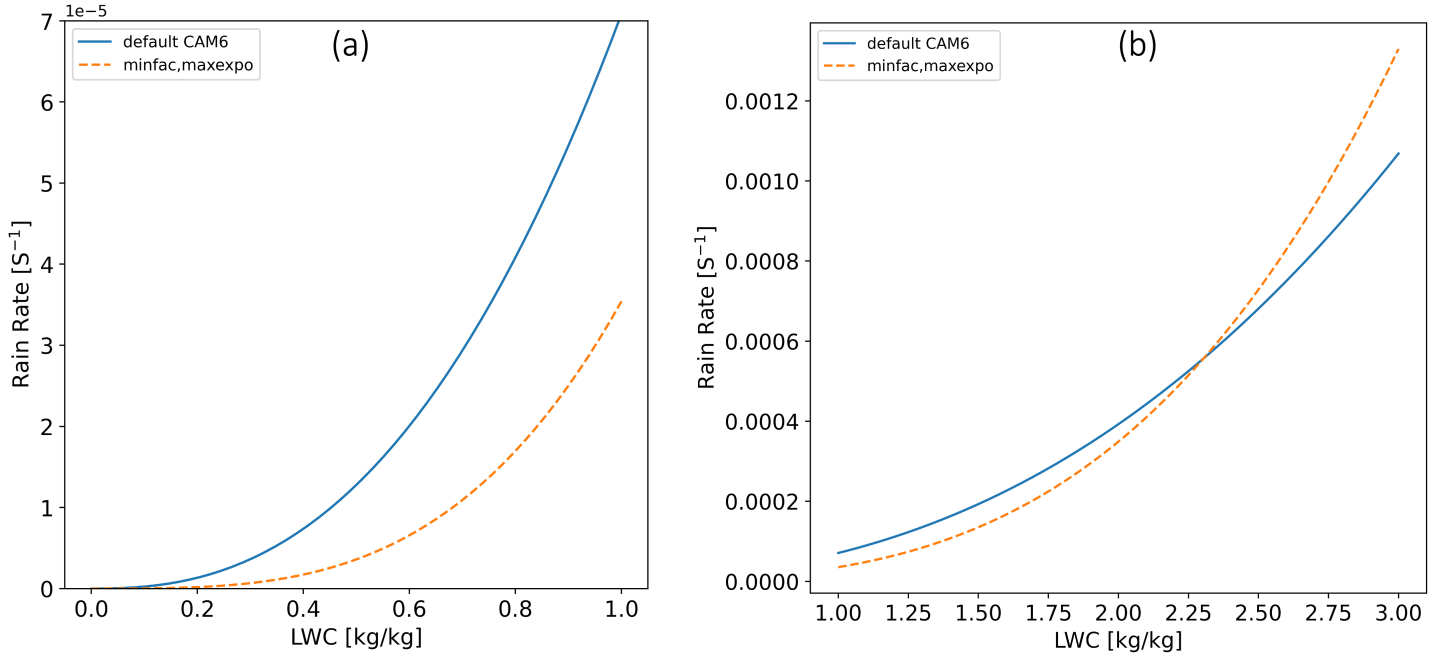

Figure S7: Rain rate [ $\text{PR: S}^{-1}$ ] versus liquid water content [ $\text{LWC: kg/kg}$ ] from CAM6 default configuration (blue) and configuration suggested by observations of CCN from SOCRATES (orange) for which scale factor (a in Eq 7) is minimized and the exponent (b in Eq 7) is maximized. (a) LWC varies between 0 to 1  $\text{kg/kg}$ , which is a typical range simulated in CAM6 PPE. Within this LWC range, CAM6 default model overestimates rain rate. (b) LWC varies between 1 to 3  $\text{kg/kg}$ . LWC in this range is not possible in CAM6 PPE but we are showing the extreme case at which CAM6 default model might underestimate rain rate at  $\text{LWC} > 2.4 \text{ kg/kg}$ .



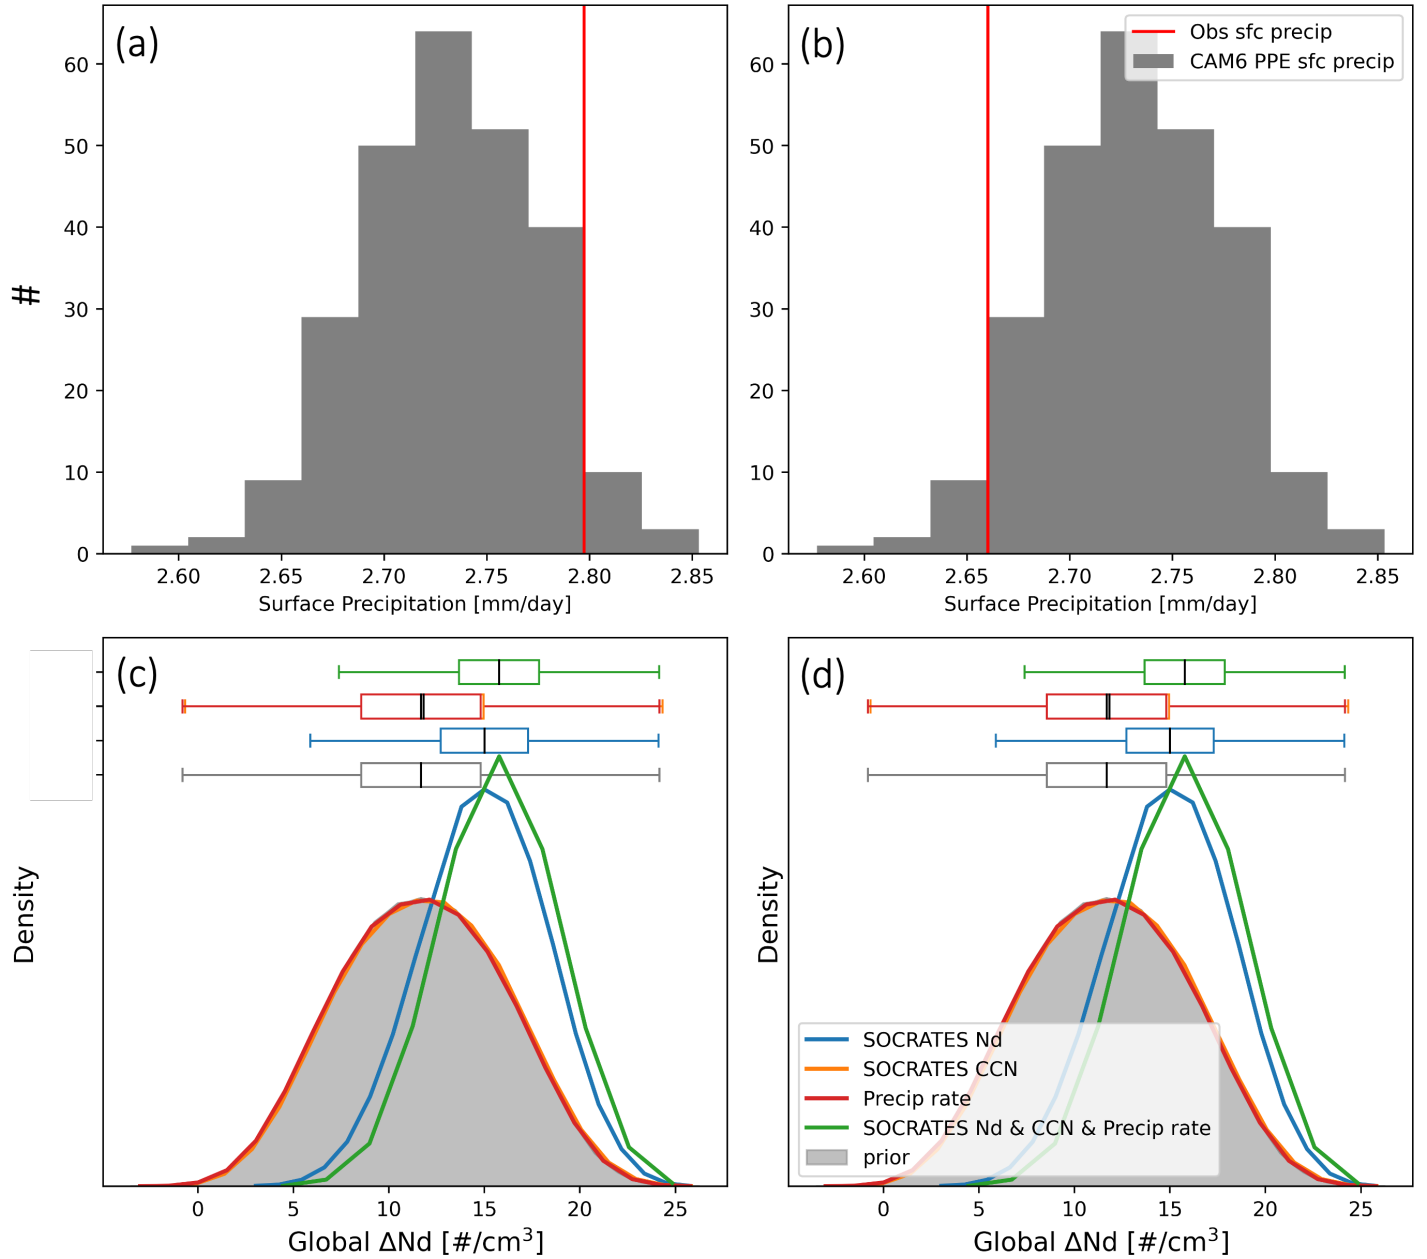

Figure S8: Theoretical scenarios of the distribution of  $\Delta N_{d,PD-PI}$  constrained by observations of CCN and  $N_d$ , and two hypothetical campaign-mean surface precipitation rates (ac and bd). (a) The distribution of campaign-mean surface precipitation from the CAM6 PPE is shown as histograms. A constraint is applied using a hypothetical campaign-mean surface precipitation rate corresponding to the 95th percentile of the CAM6 PPE distribution, with 20% uncertainty from the mean. The observationally-constrained posterior from SOCRATES observed CCN only (orange),  $N_d$  only (blue), hypothetical surface precipitation rate only (red), and combining CCN,  $N_d$  and surface precipitation rate (green) is shown in (c). (b) the same with (a) but the CAM6 PPE is constrained by campaign-mean surface precipitation rates corresponds to 5th percentile of the CAM6 PPE distribution, with 20% uncertainty from the mean. (d) the same with (c) but use hypothetical precipitation rate in (b).

Table S1: A description of the parameters that are perturbed and their ranges.

| Physics Scheme | Parameter Name            | Description                                            | Default | Min     | Max      | Units                                                                |
|----------------|---------------------------|--------------------------------------------------------|---------|---------|----------|----------------------------------------------------------------------|
| <i>CLUBB</i>   | clubb_C2rt                | Damping on scalar variances                            | 1.0     | 0.2     | 2        | -                                                                    |
|                | clubb_C6rt                | Low skewness in C6rt skewness function                 | 4.0     | 2.0     | 6        | -                                                                    |
|                | clubb_C6rtb               | High skewness in C6rt skewness function                | 6.0     | 2.0     | 8        | -                                                                    |
|                | clubb_C6thl               | Low skewness in C6thl skewness function                | 4.0     | 2.0     | 6        | -                                                                    |
|                | clubb_C6thlb              | High skewness in C6thl skewness function               | 6.0     | 2.0     | 8        | -                                                                    |
|                | clubb_C8                  | Coef. #1 in C8 skewness Equation                       | 4.2     | 1.0     | 5        | -                                                                    |
|                | clubb.beta                | Set plume widths for theta.l and rt                    | 2.4     | 1.6     | 2.5      | -                                                                    |
|                | clubb_c1                  | Low Skewness in C1 Skw.                                | 1.0     | 0.4     | 3        | -                                                                    |
|                | clubb_c11                 | Low Skewness in C11 Skw                                | 0.7     | 0.2     | 0.8      | -                                                                    |
|                | clubb_c14                 | Constant for u' <sup>2</sup> and v' <sup>2</sup> terms | 2.2     | 0.4     | 3        | -                                                                    |
|                | clubb_c_K10               | Momentum coefficient of Kh_zm                          | 0.5     | 0.2     | 1.2      | -                                                                    |
|                | clubb_gamma_coef          | Low Skw.: gamma coef. Skw                              | 0.308   | 0.25    | 0.35     | -                                                                    |
|                | clubb_wpxp_L_thresh       | Lscale threshold, damp C6 and C7                       | 60      | 20      | 200      | m                                                                    |
| <i>MG2</i>     | micro_mg_accre_enhan_fact | Accretion enhancing factor                             | 1.0     | 0.1     | 10.0     | -                                                                    |
|                | micro_mg_autocon_fact     | Autoconversion factor                                  | 0.01    | 0.005   | 0.2      | -                                                                    |
|                | micro_mg_autocon_lwp_exp  | KK2000 LWP exponent                                    | 2.47    | 2.10    | 3.30     | -                                                                    |
|                | micro_mg_autocon_nd_exp   | KK2000 autoconversion exponent                         | -1.1    | -0.8    | -2       | -                                                                    |
|                | micro_mg_berg_eff_factor  | Bergeron efficiency factor                             | 1.0     | 0.1     | 1.0      | -                                                                    |
|                | micro_mg_dcs              | Autoconversion size threshold ice-snow                 | 500e-06 | 50e-06  | 1000e-06 | m                                                                    |
|                | micro_mg_effi_factor      | Scale effective radius for optics calculation          | 1.0     | 0.1     | 2.0      | -                                                                    |
|                | micro_mg_homog_size       | Homogeneous freezing ice particle size                 | 25e-6   | 10e-6   | 200e-6   | m                                                                    |
|                | micro_mg_iaccr_factor     | Scaling ice/snow accretion                             | 1.0     | 0.2     | 1.0      | -                                                                    |
|                | micro_mg_max_nicons       | Maximum allowed ice number concentration               | 100e6   | 1e5     | 10000e6  | # kg <sup>-1</sup>                                                   |
|                | micro_mg_vtrmi_factor     | Ice fall speed scaling                                 | 1.0     | 0.2     | 5.0      | m s <sup>-1</sup>                                                    |
| <i>Aerosol</i> | microp_aero_npccn_scale   | Scale activated liquid number                          | 1       | 0.33    | 3        | -                                                                    |
|                | microp_aero_wsub_min      | Min subgrid velocity for liq activation                | 0.2     | 0       | 0.5      | m s <sup>-1</sup>                                                    |
|                | microp_aero_wsub_scale    | Subgrid velocity for liquid activation scaling         | 1       | 0.1     | 5        | -                                                                    |
|                | microp_aero_wsubi_min     | Min subgrid velocity for ice activation                | 0.001   | 0       | 0.2      | m s <sup>-1</sup>                                                    |
|                | microp_aero_wsubi_scale   | Subgrid velocity for ice activation scaling            | 1       | 0.1     | 5        | -                                                                    |
|                | dust_emis_fact            | Dust emission scaling factor                           | 0.7     | 0.1     | 1.0      | -                                                                    |
|                | seasalt_emis_scale        | Seasalt emission scaling factor                        | 1.0     | 0.5     | 2.5      | -                                                                    |
|                | sol_factb_interstitial    | Below cloud scavenging of interstitial modal aerosols  | 0.1     | 0.1     | 1        | -                                                                    |
|                | sol_factic_interstitial   | In-cloud scavenging of interstitial modal aerosols     | 0.4     | 0.1     | 1        | -                                                                    |
| <i>ZM</i>      | cldfrc_dp1                | Parameter for deep convection cloud fraction           | 0.1     | 0.05    | 0.25     | -                                                                    |
|                | cldfrc_dp2                | Parameter for deep convection cloud fraction           | 500     | 100     | 1000     | -                                                                    |
|                | zmconv_c0_lnd             | Convective autoconversion over land                    | 0.0075  | 0.002   | 0.1      | m <sup>-1</sup>                                                      |
|                | zmconv_c0_ocn             | Convective autoconversion over ocean                   | 0.03    | 0.02    | 0.1      | m <sup>-1</sup>                                                      |
|                | zmconv_capelmt            | Triggering threshold for ZM convection                 | 70      | 35      | 350      | J kg <sup>-1</sup>                                                   |
|                | zmconv_dmpdz              | Entrainment parameter                                  | -1.0e-3 | -2.0e-3 | -2.0e-4  | m <sup>-1</sup>                                                      |
|                | zmconv_ke                 | Convective evaporation efficiency                      | 5.0e-6  | 1.0e-6  | 1.0e-5   | (kg m <sup>-2</sup> s <sup>-1</sup> ) <sup>0.5</sup> s <sup>-1</sup> |
|                | zmconv_ke_lnd             | Convective evaporation efficiency over land            | 1.0e-5  | 1.0e-6  | 1.0e-5   | (kg m <sup>-2</sup> s <sup>-1</sup> ) <sup>0.5</sup> s <sup>-1</sup> |
|                | zmconv_momcd              | Efficiency of pressure term in ZM downdraft CMT        | 0.7     | 0       | 1        | -                                                                    |
|                | mconv_momcu               | Efficiency of pressure term in ZM updraft CMT          | 0.7     | 0       | 1        | -                                                                    |
|                | zmconv_num_cin            | Allowed number of negative buoyancy crossings          | 1       | 1       | 5        | -                                                                    |
|                | zmconv_tiedke_add         | Convective parcel temperature perturbation             | 0.5     | 0       | 2        | K                                                                    |
